# Supplementary material for: Mortality outcomes for Chinese and Japanese immigrants in the USA and countries of origin (Hong Kong, Japan): a comparative analysis using national mortality records from 2003 to 2011
Source: PubMed Central journal article supplement — BMJ Open. 2016 Oct 28;6(10):e012201. doi: 10.1136/bmjopen-2016-012201 (PMC5093623; doi:10.1136/bmjopen-2016-012201), 2016-10-28

## Supplementary figures

Figure S1. Year by year cause-specific age-adjusted mortality rates (cancer, heart disease, cerebrovascular disease, and communicable disease) plotted from 2003-2011 for Chinese populations by sex.

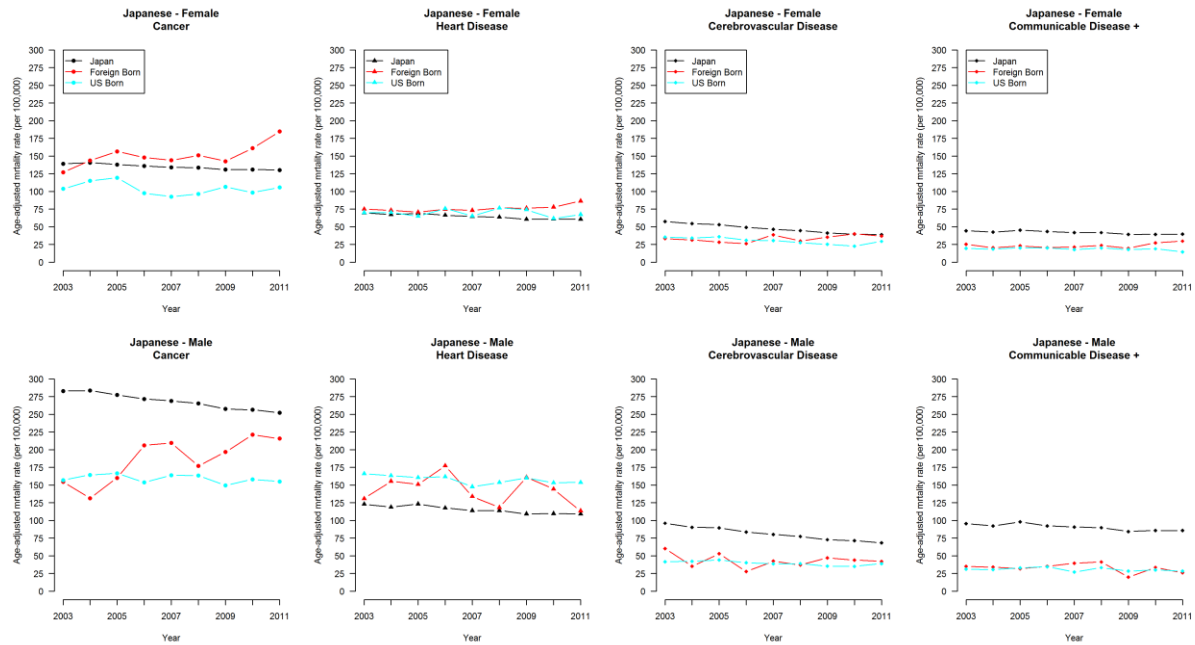

Figure S2. Year by year cause-specific age-adjusted mortality rates (cancer, heart disease, cerebrovascular disease, and communicable disease) plotted from 2003-2011 for Japanese populations by sex.

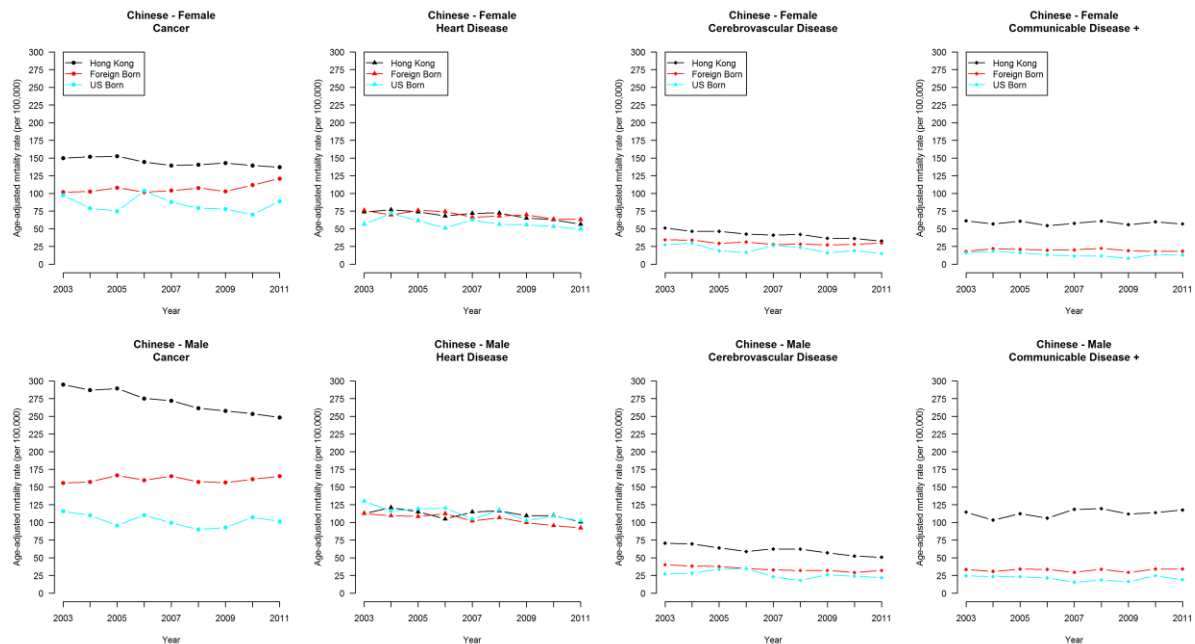

Supplement: bmjopen-2016-012201supp_figures.pdf [file bmjopen-2016-012201supp_figures.pdf]
