# Supplementary material for: Mortality outcomes for Chinese and Japanese immigrants in the USA and countries of origin (Hong Kong, Japan): a comparative analysis using national mortality records from 2003 to 2011
Source: PubMed Central journal article supplement — BMJ Open. 2016 Oct 28;6(10):e012201. doi: 10.1136/bmjopen-2016-012201 (PMC5093623; doi:10.1136/bmjopen-2016-012201), 2016-10-28
Supplement: bmjopen-2016-012201supp_tables.pdf [file bmjopen-2016-012201supp_tables.pdf]

## SUPPLEMENTARY DATA

Table S1. Year by year mortality age-standardized mortality rates, regression slopes (annual rate of change) and p-values for all cause mortality, cancer, heart disease, cerebrovascular disease, and communicable diseases by sex and Chinese population (Hong Kong, Foreign-Born, and US-born) for the years 2003-2011.

|           |                 | HONG KONG                  |        |        | FOREIGN BORN |        |        | US BORN      |        |        |
|-----------|-----------------|----------------------------|--------|--------|--------------|--------|--------|--------------|--------|--------|
| ALL CAUSE |                 | AR                         | LCI    | UCI    | AR           | LCI    | UCI    | AR           | LCI    | UCI    |
| FEMALE    | 2003            | 480.32                     | 472.51 | 488.25 | 314.94       | 304.41 | 325.82 | 274.85       | 247.83 | 304.64 |
|           | 2004            | 467.25                     | 459.69 | 474.92 | 312.07       | 301.79 | 322.69 | 294.80       | 267.43 | 324.82 |
|           | 2005            | 467.69                     | 460.27 | 475.23 | 323.30       | 312.98 | 333.95 | 245.26       | 221.53 | 271.48 |
|           | 2006            | 430.90                     | 423.88 | 438.03 | 316.58       | 306.53 | 326.95 | 275.06       | 250.00 | 302.54 |
|           | 2007            | 429.98                     | 423.15 | 436.92 | 312.00       | 302.18 | 322.12 | 266.77       | 242.62 | 293.24 |
|           | 2008            | 435.41                     | 428.67 | 442.25 | 316.75       | 307.05 | 326.76 | 261.63       | 238.42 | 287.05 |
|           | 2009            | 416.55                     | 409.99 | 423.20 | 313.34       | 303.85 | 323.13 | 236.55       | 214.94 | 260.29 |
|           | 2010            | 412.19                     | 405.79 | 418.69 | 320.43       | 310.92 | 330.23 | 239.80       | 218.41 | 263.25 |
|           | 2011            | 388.96                     | 382.86 | 395.16 | 338.68       | 329.03 | 348.61 | 257.35       | 235.18 | 281.55 |
|           | Slope (p-value) | <b>-10.47 (p&lt;0.05)*</b> |        |        | 1.67 (0.13)  |        |        | -4.43 (0.06) |        |        |
| MALE      | 2003            | 843.97                     | 832.22 | 855.86 | 470.07       | 455.49 | 485.09 | 426.50       | 390.13 | 465.93 |
|           | 2004            | 838.96                     | 827.45 | 850.62 | 460.49       | 446.32 | 475.07 | 386.44       | 352.71 | 423.09 |
|           | 2005            | 828.35                     | 817.14 | 839.70 | 485.26       | 470.93 | 500.00 | 390.37       | 357.97 | 425.51 |
|           | 2006            | 774.99                     | 764.36 | 785.76 | 473.29       | 459.35 | 487.63 | 402.06       | 369.47 | 437.31 |
|           | 2007            | 798.80                     | 788.25 | 809.48 | 460.43       | 446.92 | 474.31 | 364.61       | 334.21 | 397.58 |
|           | 2008            | 783.53                     | 773.26 | 793.94 | 466.40       | 453.02 | 480.15 | 348.49       | 319.55 | 379.87 |
|           | 2009            | 749.35                     | 739.46 | 759.36 | 455.13       | 442.10 | 468.53 | 358.16       | 328.77 | 389.97 |
|           | 2010            | 749.44                     | 739.73 | 759.27 | 462.28       | 449.30 | 475.62 | 401.12       | 370.84 | 433.69 |
|           | 2011            | 713.06                     | 703.75 | 722.49 | 479.69       | 466.67 | 493.05 | 380.00       | 351.40 | 410.80 |
|           | Slope (p-value) | <b>-15.69 (p&lt;0.05)*</b> |        |        | -0.39 (0.78) |        |        | -4.33 (0.19) |        |        |
| CANCER    |                 |                            |        |        |              |        |        |              |        |        |
|           | FEMALE          |                            |        |        |              |        |        |              |        |        |
|           | 2003            | 149.78                     | 145.17 | 154.53 | 101.78       | 95.59  | 108.34 | 97.40        | 80.27  | 117.62 |
|           | 2004            | 151.75                     | 147.20 | 156.43 | 102.58       | 96.48  | 109.05 | 79.07        | 64.39  | 96.66  |

|                        |                           |                           |        |             |                      |        |                     |                     |        |        |
|------------------------|---------------------------|---------------------------|--------|-------------|----------------------|--------|---------------------|---------------------|--------|--------|
| MALE                   | <b>2005</b>               | 152.56                    | 148.06 | 157.20      | 108.11               | 101.93 | 114.63              | 74.83               | 61.21  | 91.18  |
|                        | <b>2006</b>               | 144.30                    | 139.99 | 148.74      | 101.91               | 96.00  | 108.15              | 103.68              | 87.33  | 122.70 |
|                        | <b>2007</b>               | 139.47                    | 135.30 | 143.75      | 103.95               | 98.07  | 110.15              | 87.72               | 72.92  | 105.12 |
|                        | <b>2008</b>               | 140.40                    | 136.29 | 144.63      | 107.75               | 101.87 | 113.96              | 79.41               | 66.08  | 95.16  |
|                        | <b>2009</b>               | 142.97                    | 138.86 | 147.19      | 102.95               | 97.30  | 108.92              | 77.91               | 64.68  | 93.55  |
|                        | <b>2010</b>               | 139.42                    | 135.43 | 143.51      | 111.78               | 105.94 | 117.92              | 70.11               | 57.73  | 84.82  |
|                        | <b>2011</b>               | 137.04                    | 133.13 | 141.04      | 120.94               | 114.92 | 127.25              | 89.04               | 75.14  | 105.19 |
|                        | <b>Slope (p-value)</b>    | <b>-1.85 (p&lt;0.05)*</b> |        |             | <b>1.66 (0.03)*</b>  |        |                     | <b>-1.31 (0.39)</b> |        |        |
|                        | <b>2003</b>               | 294.78                    | 287.90 | 301.80      | 155.86               | 147.42 | 164.73              | 115.77              | 96.80  | 137.97 |
|                        | <b>2004</b>               | 286.97                    | 280.29 | 293.80      | 157.22               | 148.88 | 165.97              | 109.84              | 91.58  | 131.22 |
| <b>2005</b>            | 289.27                    | 282.67                    | 296.00 | 166.45      | 158.00               | 175.31 | 95.43               | 79.15               | 114.64 |        |
| <b>2006</b>            | 275.14                    | 268.82                    | 281.60 | 159.65      | 151.51               | 168.20 | 110.41              | 92.92               | 130.76 |        |
| <b>2007</b>            | 272.20                    | 266.04                    | 278.50 | 165.31      | 157.16               | 173.84 | 99.39               | 83.28               | 118.25 |        |
| <b>2008</b>            | 261.51                    | 255.54                    | 267.60 | 157.35      | 149.51               | 165.56 | 90.10               | 75.58               | 107.18 |        |
| <b>2009</b>            | 257.82                    | 252.00                    | 263.77 | 156.29      | 148.59               | 164.34 | 92.85               | 77.89               | 110.35 |        |
| <b>2010</b>            | 253.57                    | 247.90                    | 259.37 | 161.03      | 153.32               | 169.09 | 107.18              | 91.33               | 125.46 |        |
| <b>2011</b>            | 248.34                    | 242.79                    | 254.01 | 165.24      | 157.52               | 173.31 | 101.46              | 86.41               | 118.85 |        |
| <b>Slope (p-value)</b> | <b>-6.04 (p&lt;0.05)*</b> |                           |        | 0.44 (0.46) |                      |        | <b>-1.51 (0.20)</b> |                     |        |        |
| <b>HEART DISEASE</b>   |                           |                           |        |             |                      |        |                     |                     |        |        |
| FEMALE                 | <b>2003</b>               | 73.81                     | 70.90  | 76.85       | 76.08                | 71.14  | 81.37               | 56.51               | 45.80  | 69.92  |
|                        | <b>2004</b>               | 76.94                     | 74.01  | 79.98       | 69.61                | 64.99  | 74.56               | 71.68               | 59.31  | 86.67  |
|                        | <b>2005</b>               | 73.88                     | 71.07  | 76.80       | 76.00                | 71.24  | 81.09               | 61.58               | 50.16  | 75.58  |
|                        | <b>2006</b>               | 68.11                     | 65.46  | 70.86       | 74.36                | 69.73  | 79.30               | 51.01               | 41.44  | 62.96  |
|                        | <b>2007</b>               | 71.75                     | 69.10  | 74.51       | 66.35                | 62.04  | 70.96               | 62.46               | 51.56  | 75.72  |
|                        | <b>2008</b>               | 72.31                     | 69.72  | 75.00       | 67.90                | 63.63  | 72.46               | 56.18               | 46.21  | 68.39  |
|                        | <b>2009</b>               | 64.88                     | 62.43  | 67.43       | 69.80                | 65.55  | 74.34               | 55.43               | 45.64  | 67.39  |
|                        | <b>2010</b>               | 62.93                     | 60.56  | 65.38       | 63.66                | 59.65  | 67.95               | 53.11               | 44.10  | 64.16  |
|                        | <b>2011</b>               | 56.30                     | 54.12  | 58.58       | 63.14                | 59.19  | 67.35               | 49.55               | 40.44  | 60.73  |
|                        | <b>Slope (p-value)</b>    | <b>-2.10 (p&lt;0.05)*</b> |        |             | <b>-1.49 (0.04)*</b> |        |                     | <b>-1.51 (0.08)</b> |        |        |

|                        |             |                        |                          |        |        |                           |        |        |                      |        |
|------------------------|-------------|------------------------|--------------------------|--------|--------|---------------------------|--------|--------|----------------------|--------|
| MALE                   | <b>2003</b> | 112.71                 | 108.45                   | 117.12 | 112.42 | 105.45                    | 119.83 | 130.00 | 110.47               | 152.63 |
|                        | <b>2004</b> | 120.86                 | 116.53                   | 125.33 | 109.31 | 102.54                    | 116.49 | 115.94 | 97.74                | 137.16 |
|                        | <b>2005</b> | 114.80                 | 110.67                   | 119.08 | 108.46 | 101.81                    | 115.51 | 119.02 | 101.36               | 139.50 |
|                        | <b>2006</b> | 104.81                 | 100.93                   | 108.82 | 112.28 | 105.62                    | 119.33 | 120.30 | 103.12               | 140.15 |
|                        | <b>2007</b> | 114.75                 | 110.80                   | 118.83 | 102.24 | 96.00                     | 108.85 | 104.66 | 88.67                | 123.29 |
|                        | <b>2008</b> | 116.37                 | 112.47                   | 120.40 | 106.71 | 100.42                    | 113.37 | 117.57 | 100.75               | 136.93 |
|                        | <b>2009</b> | 109.40                 | 105.67                   | 113.25 | 99.64  | 93.65                     | 106.00 | 102.40 | 87.09                | 120.18 |
|                        | <b>2010</b> | 109.56                 | 105.89                   | 113.36 | 95.48  | 89.72                     | 101.60 | 109.13 | 93.59                | 127.04 |
|                        | <b>2011</b> | 100.75                 | 97.30                    | 104.32 | 92.10  | 86.53                     | 98.01  | 102.11 | 87.67                | 118.81 |
|                        |             | <b>Slope (p-value)</b> | -1.35 (0.09)             |        |        | <b>-2.43 (p&lt;0.05)*</b> |        |        | <b>-2.80 (0.01)*</b> |        |
| <b>CEREBROVASCULAR</b> |             |                        |                          |        |        |                           |        |        |                      |        |
| FEMALE                 | <b>2003</b> | 51.03                  | 48.59                    | 53.59  | 34.34  | 30.99                     | 38.05  | 27.40  | 19.59                | 38.16  |
|                        | <b>2004</b> | 46.37                  | 44.09                    | 48.78  | 34.08  | 30.80                     | 37.71  | 29.58  | 21.58                | 40.41  |
|                        | <b>2005</b> | 46.41                  | 44.17                    | 48.77  | 29.22  | 26.23                     | 32.55  | 18.81  | 13.06                | 27.23  |
|                        | <b>2006</b> | 42.45                  | 40.34                    | 44.67  | 31.38  | 28.29                     | 34.80  | 16.62  | 10.91                | 25.06  |
|                        | <b>2007</b> | 41.09                  | 39.06                    | 43.22  | 27.70  | 24.90                     | 30.82  | 26.26  | 19.79                | 35.09  |
|                        | <b>2008</b> | 41.92                  | 39.90                    | 44.04  | 28.31  | 25.48                     | 31.46  | 23.60  | 17.13                | 32.47  |
|                        | <b>2009</b> | 36.42                  | 34.56                    | 38.37  | 27.23  | 24.48                     | 30.28  | 16.02  | 11.14                | 23.21  |
|                        | <b>2010</b> | 36.07                  | 34.25                    | 37.99  | 28.12  | 25.41                     | 31.12  | 19.18  | 13.83                | 26.72  |
|                        | <b>2011</b> | 32.65                  | 30.95                    | 34.44  | 29.69  | 26.91                     | 32.76  | 14.99  | 10.40                | 21.74  |
|                        |             | <b>Slope (p-value)</b> | <b>-2.08 (p&lt;0.5)*</b> |        |        | <b>-0.73 (0.02)*</b>      |        |        | -1.32 (0.05)         |        |
| MALE                   | <b>2003</b> | 70.50                  | 67.14                    | 74.01  | 40.14  | 35.99                     | 44.73  | 27.13  | 18.38                | 39.29  |
|                        | <b>2004</b> | 69.49                  | 66.22                    | 72.90  | 38.26  | 34.31                     | 42.64  | 28.09  | 20.20                | 38.96  |
|                        | <b>2005</b> | 63.99                  | 60.93                    | 67.20  | 37.60  | 33.73                     | 41.88  | 33.73  | 24.70                | 45.73  |
|                        | <b>2006</b> | 58.76                  | 55.90                    | 61.76  | 34.85  | 31.16                     | 38.94  | 34.83  | 26.02                | 46.44  |
|                        | <b>2007</b> | 62.45                  | 59.55                    | 65.48  | 32.90  | 29.39                     | 36.80  | 23.08  | 16.17                | 32.74  |
|                        | <b>2008</b> | 62.10                  | 59.27                    | 65.05  | 32.01  | 28.60                     | 35.80  | 17.97  | 11.74                | 27.00  |
|                        | <b>2009</b> | 57.03                  | 54.36                    | 59.81  | 32.00  | 28.63                     | 35.73  | 25.93  | 18.15                | 36.44  |
|                        | <b>2010</b> | 52.34                  | 49.84                    | 54.97  | 29.25  | 26.08                     | 32.78  | 23.99  | 17.17                | 33.29  |
|                        | <b>2011</b> | 50.77                  | 48.35                    | 53.31  | 32.01  | 28.73                     | 35.64  | 21.75  | 15.63                | 30.21  |

| Slope (p-value)     |             | <b>-2.35 (p&lt;0.05)*</b> |              |        | <b>-1.23 (p&lt;0.05)*</b> |              |       | -1.10 (0.12) |              |       |
|---------------------|-------------|---------------------------|--------------|--------|---------------------------|--------------|-------|--------------|--------------|-------|
| <b>COMMUNICABLE</b> |             |                           |              |        |                           |              |       |              |              |       |
| FEMALE              | <b>2003</b> | 61.20                     | 58.61        | 63.91  | 18.05                     | 15.67        | 20.79 | 18.05        | 15.67        | 20.79 |
|                     | <b>2004</b> | 56.67                     | 54.27        | 59.19  | 21.87                     | 19.26        | 24.82 | 21.87        | 19.26        | 24.82 |
|                     | <b>2005</b> | 60.63                     | 58.20        | 63.18  | 20.93                     | 18.42        | 23.78 | 20.93        | 18.42        | 23.78 |
|                     | <b>2006</b> | 54.32                     | 52.07        | 56.68  | 19.74                     | 17.36        | 22.46 | 19.74        | 17.36        | 22.46 |
|                     | <b>2007</b> | 57.61                     | 55.37        | 59.95  | 20.14                     | 17.78        | 22.83 | 20.14        | 17.78        | 22.83 |
|                     | <b>2008</b> | 60.80                     | 58.55        | 63.15  | 22.35                     | 19.89        | 25.13 | 22.35        | 19.89        | 25.13 |
|                     | <b>2009</b> | 55.77                     | 53.63        | 58.00  | 18.94                     | 16.73        | 21.44 | 18.94        | 16.73        | 21.44 |
|                     | <b>2010</b> | 59.62                     | 57.44        | 61.89  | 18.04                     | 15.87        | 20.50 | 18.04        | 15.87        | 20.50 |
|                     | <b>2011</b> | 56.83                     | 54.76        | 58.99  | 18.27                     | 16.17        | 20.64 | 18.27        | 16.17        | 20.64 |
|                     |             | <b>Slope (p-value)</b>    | -0.20 (0.57) |        |                           | -0.20 (0.38) |       |              | -0.73 (0.05) |       |
| MALE                | <b>2003</b> | 114.59                    | 110.25       | 119.07 | 33.28                     | 29.55        | 37.44 | 24.30        | 16.27        | 35.69 |
|                     | <b>2004</b> | 103.21                    | 99.19        | 107.38 | 30.69                     | 27.16        | 34.65 | 23.38        | 15.77        | 34.18 |
|                     | <b>2005</b> | 112.46                    | 108.36       | 116.70 | 33.89                     | 30.26        | 37.92 | 23.23        | 16.23        | 33.13 |
|                     | <b>2006</b> | 105.92                    | 102.06       | 109.93 | 33.45                     | 29.87        | 37.42 | 21.44        | 14.55        | 31.23 |
|                     | <b>2007</b> | 118.43                    | 114.45       | 122.54 | 29.48                     | 26.21        | 33.14 | 15.24        | 9.78         | 23.52 |
|                     | <b>2008</b> | 119.60                    | 115.69       | 123.65 | 33.72                     | 30.24        | 37.57 | 18.64        | 12.70        | 27.21 |
|                     | <b>2009</b> | 111.92                    | 108.22       | 115.74 | 29.32                     | 26.14        | 32.87 | 16.18        | 10.92        | 23.97 |
|                     | <b>2010</b> | 113.84                    | 110.19       | 117.61 | 34.05                     | 30.66        | 37.80 | 24.64        | 17.52        | 34.30 |
|                     | <b>2011</b> | 117.54                    | 113.90       | 121.29 | 34.15                     | 30.79        | 37.86 | 18.90        | 12.99        | 27.25 |
|                     |             | <b>Slope (p-value)</b>    | 0.94 (0.21)  |        |                           | 0.08 (0.78)  |       |              | -0.58 (0.23) |       |

\*Significant trends (p<0.05) are indicated in bold

Table S2. Year by year mortality age-standardized mortality rates, regression slopes (annual rate of change) and p-values for all cause mortality, cancer, heart disease, cerebrovascular disease, and communicable diseases by sex and Japanese population (Japan, Foreign-Born, and US-born) for the years 2003-2011.

| ALL CAUSE     |             | JAPAN                  |                            |        | FOREIGN BORN |                          |        | US BORN |              |        |
|---------------|-------------|------------------------|----------------------------|--------|--------------|--------------------------|--------|---------|--------------|--------|
|               |             | AR                     | LCI                        | UCI    | AR           | LCI                      | UCI    | AR      | LCI          | UCI    |
| FEMALE        | <b>2003</b> | 428.27                 | 426.87                     | 429.67 | 378.23       | 354.32                   | 403.98 | 333.43  | 314.28       | 354.64 |
|               | <b>2004</b> | 421.76                 | 420.38                     | 423.15 | 394.92       | 370.22                   | 421.48 | 345.80  | 326.33       | 367.33 |
|               | <b>2005</b> | 423.98                 | 422.61                     | 425.36 | 404.01       | 379.18                   | 430.70 | 358.64  | 338.57       | 380.78 |
|               | <b>2006</b> | 411.52                 | 410.18                     | 412.87 | 397.60       | 373.27                   | 423.78 | 349.50  | 329.90       | 371.19 |
|               | <b>2007</b> | 404.82                 | 403.49                     | 406.15 | 421.44       | 396.51                   | 448.21 | 326.74  | 308.36       | 347.19 |
|               | <b>2008</b> | 402.56                 | 401.24                     | 403.87 | 422.14       | 397.57                   | 448.52 | 351.80  | 332.84       | 372.83 |
|               | <b>2009</b> | 388.39                 | 387.10                     | 389.68 | 435.58       | 410.66                   | 462.32 | 360.91  | 340.98       | 382.94 |
|               | <b>2010</b> | 392.71                 | 391.43                     | 393.99 | 474.60       | 448.52                   | 502.52 | 324.85  | 307.05       | 344.72 |
|               | <b>2011</b> | 406.83                 | 405.51                     | 408.15 | 536.36       | 508.06                   | 566.52 | 352.40  | 333.11       | 373.80 |
|               |             | <b>Slope (p-value)</b> | <b>-4.22 (p&lt;0.05)*</b>  |        |              | <b>15.99 (p&lt;0.05)</b> |        |         | 0.33 (0.86)  |        |
| MALE          | <b>2003</b> | 847.69                 | 845.38                     | 850.00 | 556.58       | 495.32                   | 624.43 | 592.63  | 565.37       | 621.90 |
|               | <b>2004</b> | 828.51                 | 826.26                     | 830.77 | 547.85       | 486.92                   | 615.42 | 597.54  | 570.35       | 626.73 |
|               | <b>2005</b> | 836.27                 | 834.04                     | 838.50 | 627.43       | 560.55                   | 701.10 | 613.93  | 586.15       | 643.72 |
|               | <b>2006</b> | 805.57                 | 803.41                     | 807.74 | 663.32       | 595.26                   | 738.09 | 608.71  | 581.53       | 637.90 |
|               | <b>2007</b> | 792.95                 | 790.83                     | 795.08 | 619.26       | 553.45                   | 691.81 | 596.70  | 569.62       | 625.80 |
|               | <b>2008</b> | 786.54                 | 784.45                     | 788.63 | 590.96       | 526.95                   | 661.72 | 600.38  | 573.30       | 629.49 |
|               | <b>2009</b> | 763.39                 | 761.35                     | 765.44 | 660.87       | 591.65                   | 736.97 | 589.55  | 563.15       | 617.97 |
|               | <b>2010</b> | 769.45                 | 767.43                     | 771.48 | 660.54       | 592.36                   | 735.52 | 601.87  | 574.94       | 630.83 |
|               | <b>2011</b> | 772.38                 | 770.37                     | 774.40 | 599.09       | 533.90                   | 671.14 | 600.55  | 573.50       | 629.64 |
|               |             | <b>Slope (p-value)</b> | <b>-10.72 (p&lt;0.05)*</b> |        |              | 8.38 (0.15)              |        |         | -0.21 (0.85) |        |
| <b>CANCER</b> |             |                        |                            |        |              |                          |        |         |              |        |
| FEMALE        | <b>2003</b> | 138.91                 | 138.04                     | 139.78 | 127.12       | 113.30                   | 142.86 | 103.72  | 92.28        | 117.44 |
|               | <b>2004</b> | 140.68                 | 139.82                     | 141.56 | 143.54       | 128.37                   | 160.66 | 114.80  | 102.85       | 129.01 |
|               | <b>2005</b> | 137.93                 | 137.08                     | 138.79 | 156.44       | 140.68                   | 174.16 | 119.19  | 106.74       | 133.93 |

|                      |                        |                           |        |        |                          |        |        |                     |        |        |
|----------------------|------------------------|---------------------------|--------|--------|--------------------------|--------|--------|---------------------|--------|--------|
|                      | <b>2006</b>            | 135.81                    | 134.97 | 136.66 | 147.85                   | 132.95 | 164.67 | 97.35               | 86.59  | 110.41 |
|                      | <b>2007</b>            | 134.17                    | 133.34 | 135.02 | 143.93                   | 129.19 | 160.60 | 92.68               | 81.54  | 106.19 |
|                      | <b>2008</b>            | 133.62                    | 132.79 | 134.46 | 151.01                   | 136.14 | 167.79 | 96.52               | 85.88  | 109.47 |
|                      | <b>2009</b>            | 130.78                    | 129.97 | 131.61 | 142.71                   | 128.24 | 159.10 | 106.51              | 94.48  | 120.91 |
|                      | <b>2010</b>            | 130.86                    | 130.05 | 131.68 | 161.08                   | 145.70 | 178.37 | 98.42               | 87.73  | 111.42 |
|                      | <b>2011</b>            | 130.26                    | 129.44 | 131.07 | 184.65                   | 167.83 | 203.42 | 105.69              | 94.32  | 119.40 |
|                      | <b>Slope (p-value)</b> | <b>-1.34 (p&lt;0.05)*</b> |        |        | <b>4.31 (0.02)*</b>      |        |        | <b>-1.12 (0.35)</b> |        |        |
| <b>MALE</b>          |                        |                           |        |        |                          |        |        |                     |        |        |
|                      | <b>2003</b>            | 283.04                    | 281.73 | 284.35 | 154.55                   | 123.48 | 192.36 | 156.97              | 143.24 | 172.82 |
|                      | <b>2004</b>            | 283.54                    | 282.25 | 284.84 | 131.40                   | 103.00 | 166.59 | 164.37              | 150.35 | 180.49 |
|                      | <b>2005</b>            | 277.57                    | 276.31 | 278.83 | 160.14                   | 128.31 | 198.77 | 166.48              | 152.13 | 182.96 |
|                      | <b>2006</b>            | 271.81                    | 270.58 | 273.05 | 206.05                   | 169.63 | 249.24 | 153.79              | 140.29 | 169.42 |
|                      | <b>2007</b>            | 268.98                    | 267.77 | 270.19 | 209.54                   | 172.68 | 253.20 | 163.84              | 149.98 | 179.81 |
|                      | <b>2008</b>            | 265.28                    | 264.10 | 266.48 | 177.17                   | 143.58 | 217.59 | 163.49              | 149.34 | 179.78 |
|                      | <b>2009</b>            | 257.57                    | 256.41 | 258.73 | 196.60                   | 159.38 | 240.99 | 149.59              | 136.48 | 164.83 |
|                      | <b>2010</b>            | 256.41                    | 255.27 | 257.56 | 221.27                   | 183.25 | 266.13 | 158.02              | 144.23 | 173.97 |
|                      | <b>2011</b>            | 252.18                    | 251.06 | 253.31 | 215.63                   | 177.85 | 260.32 | 154.91              | 141.27 | 170.73 |
|                      | <b>Slope (p-value)</b> | <b>-4.19 (p&lt;0.05)*</b> |        |        | <b>9.30 (p&lt;0.05)*</b> |        |        | <b>-0.86 (0.28)</b> |        |        |
| <b>HEART DISEASE</b> |                        |                           |        |        |                          |        |        |                     |        |        |
| <b>FEMALE</b>        |                        |                           |        |        |                          |        |        |                     |        |        |
|                      | <b>2003</b>            | 69.50                     | 68.99  | 70.02  | 74.86                    | 64.80  | 86.82  | 70.04               | 62.59  | 79.68  |
|                      | <b>2004</b>            | 67.23                     | 66.73  | 67.73  | 73.41                    | 63.46  | 85.26  | 70.13               | 62.49  | 79.97  |
|                      | <b>2005</b>            | 68.88                     | 68.39  | 69.39  | 70.77                    | 61.04  | 82.40  | 64.86               | 57.51  | 74.46  |
|                      | <b>2006</b>            | 66.26                     | 65.77  | 66.74  | 74.53                    | 64.58  | 86.38  | 75.78               | 67.15  | 86.66  |
|                      | <b>2007</b>            | 64.54                     | 64.07  | 65.02  | 73.13                    | 63.41  | 84.75  | 65.22               | 58.12  | 74.56  |
|                      | <b>2008</b>            | 63.73                     | 63.27  | 64.20  | 76.56                    | 66.46  | 88.58  | 76.57               | 68.74  | 86.63  |
|                      | <b>2009</b>            | 60.53                     | 60.08  | 60.98  | 76.25                    | 66.39  | 88.00  | 74.05               | 66.39  | 83.94  |
|                      | <b>2010</b>            | 60.92                     | 60.48  | 61.36  | 77.77                    | 67.85  | 89.59  | 61.72               | 54.99  | 70.73  |
|                      | <b>2011</b>            | 60.46                     | 60.03  | 60.90  | 86.33                    | 75.50  | 99.10  | 67.33               | 60.62  | 76.29  |
|                      | <b>Slope (p-value)</b> | <b>-1.24 (p&lt;0.05)*</b> |        |        | <b>1.20 (0.02)*</b>      |        |        | <b>-0.28 (0.70)</b> |        |        |
| <b>MALE</b>          | <b>2003</b>            | 122.91                    | 122.04 | 123.79 | 130.85                   | 101.79 | 166.83 | 165.93              | 151.76 | 182.19 |

|                        |                        |                           |        |        |                     |        |        |                           |        |        |
|------------------------|------------------------|---------------------------|--------|--------|---------------------|--------|--------|---------------------------|--------|--------|
|                        | <b>2004</b>            | 118.61                    | 117.76 | 119.46 | 155.34              | 122.31 | 195.55 | 163.40                    | 149.76 | 179.12 |
|                        | <b>2005</b>            | 123.12                    | 122.27 | 123.97 | 150.81              | 118.08 | 190.79 | 160.66                    | 146.99 | 176.42 |
|                        | <b>2006</b>            | 117.54                    | 116.72 | 118.37 | 177.30              | 142.14 | 219.59 | 161.88                    | 148.65 | 177.19 |
|                        | <b>2007</b>            | 113.91                    | 113.12 | 114.72 | 133.82              | 104.06 | 170.65 | 147.56                    | 134.49 | 162.76 |
|                        | <b>2008</b>            | 113.83                    | 113.04 | 114.62 | 118.14              | 90.21  | 153.21 | 153.48                    | 140.44 | 168.64 |
|                        | <b>2009</b>            | 109.18                    | 108.41 | 109.95 | 161.01              | 128.02 | 201.10 | 159.99                    | 146.74 | 175.35 |
|                        | <b>2010</b>            | 109.56                    | 108.81 | 110.32 | 144.36              | 113.32 | 182.51 | 153.29                    | 139.98 | 168.73 |
|                        | <b>2011</b>            | 109.15                    | 108.40 | 109.90 | 113.44              | 86.31  | 147.72 | 153.67                    | 140.50 | 168.98 |
|                        | <b>Slope (p-value)</b> | <b>-1.90 (p&lt;0.05)*</b> |        |        | <b>-2.36 (0.46)</b> |        |        | <b>-1.49 (0.05)</b>       |        |        |
| <b>CEREBROVASCULAR</b> |                        |                           |        |        |                     |        |        |                           |        |        |
| FEMALE                 | <b>2003</b>            | 57.56                     | 57.08  | 58.03  | 33.22               | 26.41  | 42.06  | 35.40                     | 29.81  | 43.37  |
|                        | <b>2004</b>            | 54.41                     | 53.96  | 54.88  | 31.33               | 24.62  | 40.12  | 34.08                     | 28.32  | 42.27  |
|                        | <b>2005</b>            | 52.99                     | 52.54  | 53.44  | 28.20               | 21.91  | 36.57  | 35.79                     | 29.95  | 44.05  |
|                        | <b>2006</b>            | 49.08                     | 48.65  | 49.51  | 26.31               | 20.04  | 34.73  | 30.97                     | 25.51  | 38.92  |
|                        | <b>2007</b>            | 46.52                     | 46.11  | 46.94  | 38.57               | 31.43  | 47.71  | 30.51                     | 25.45  | 38.04  |
|                        | <b>2008</b>            | 44.57                     | 44.16  | 44.97  | 29.81               | 23.50  | 38.19  | 27.44                     | 22.80  | 34.58  |
|                        | <b>2009</b>            | 41.25                     | 40.87  | 41.64  | 35.27               | 28.61  | 43.92  | 25.12                     | 20.92  | 31.88  |
|                        | <b>2010</b>            | 39.59                     | 39.21  | 39.96  | 40.08               | 32.76  | 49.41  | 22.60                     | 18.52  | 29.28  |
|                        | <b>2011</b>            | 38.80                     | 38.43  | 39.17  | 36.81               | 29.72  | 45.95  | 29.32                     | 24.27  | 36.92  |
|                        | <b>Slope (p-value)</b> | <b>-2.46 (p&lt;0.05)*</b> |        |        | <b>0.97 (0.12)</b>  |        |        | <b>-1.39 (p&lt;0.05)*</b> |        |        |
| MALE                   | <b>2003</b>            | 96.00                     | 95.24  | 96.77  | 60.09               | 41.21  | 86.07  | 41.57                     | 35.27  | 50.12  |
|                        | <b>2004</b>            | 90.18                     | 89.45  | 90.91  | 35.22               | 21.52  | 56.11  | 42.22                     | 35.85  | 50.85  |
|                        | <b>2005</b>            | 89.51                     | 88.80  | 90.23  | 52.80               | 34.81  | 78.14  | 43.90                     | 37.15  | 52.93  |
|                        | <b>2006</b>            | 83.46                     | 82.78  | 84.15  | 27.56               | 14.52  | 48.63  | 40.25                     | 34.03  | 48.75  |
|                        | <b>2007</b>            | 80.07                     | 79.41  | 80.74  | 42.30               | 26.55  | 65.48  | 38.61                     | 32.57  | 46.95  |
|                        | <b>2008</b>            | 77.33                     | 76.69  | 77.97  | 36.88               | 21.36  | 60.36  | 38.83                     | 32.24  | 47.79  |
|                        | <b>2009</b>            | 72.73                     | 72.12  | 73.35  | 47.06               | 30.15  | 71.43  | 35.31                     | 29.52  | 43.45  |
|                        | <b>2010</b>            | 71.48                     | 70.88  | 72.09  | 43.93               | 27.54  | 67.90  | 35.07                     | 29.06  | 43.46  |
|                        | <b>2011</b>            | 68.24                     | 67.66  | 68.83  | 41.93               | 26.15  | 65.24  | 38.92                     | 32.80  | 47.39  |

| Slope (p-value)     |                 | <b>-3.45 (p&lt;0.05)*</b> |                           |       | -0.81 (0.55) |             |       | <b>-0.84 (0.01)*</b> |              |       |
|---------------------|-----------------|---------------------------|---------------------------|-------|--------------|-------------|-------|----------------------|--------------|-------|
| <b>COMMUNICABLE</b> |                 |                           |                           |       |              |             |       |                      |              |       |
| FEMALE              | <b>2003</b>     | 44.36                     | 43.97                     | 44.76 | 25.20        | 19.55       | 32.88 | 19.34                | 15.47        | 25.78 |
|                     | <b>2004</b>     | 42.41                     | 42.03                     | 42.79 | 20.40        | 15.34       | 27.54 | 18.44                | 14.14        | 25.39 |
|                     | <b>2005</b>     | 45.16                     | 44.78                     | 45.55 | 22.99        | 17.72       | 30.30 | 20.16                | 15.83        | 27.10 |
|                     | <b>2006</b>     | 43.35                     | 42.98                     | 43.73 | 20.57        | 15.75       | 27.44 | 20.00                | 15.11        | 27.59 |
|                     | <b>2007</b>     | 41.86                     | 41.50                     | 42.22 | 21.31        | 16.22       | 28.47 | 17.84                | 13.89        | 24.47 |
|                     | <b>2008</b>     | 41.71                     | 41.35                     | 42.07 | 23.68        | 18.61       | 30.75 | 19.86                | 15.19        | 27.23 |
|                     | <b>2009</b>     | 39.08                     | 38.74                     | 39.43 | 19.59        | 14.92       | 26.32 | 17.78                | 13.26        | 25.07 |
|                     | <b>2010</b>     | 39.26                     | 38.92                     | 39.60 | 27.31        | 21.16       | 35.57 | 18.82                | 14.67        | 25.67 |
|                     | <b>2011</b>     | 39.61                     | 39.27                     | 39.95 | 29.68        | 23.34       | 38.10 | 14.31                | 11.45        | 20.00 |
|                     | Slope (p-value) |                           | <b>-0.70 (p&lt;0.05)*</b> |       |              | 0.58 (0.21) |       |                      | -0.40 (0.09) |       |
| MALE                | <b>2003</b>     | 95.28                     | 94.54                     | 96.03 | 34.95        | 20.69       | 56.69 | 31.00                | 25.09        | 39.29 |
|                     | <b>2004</b>     | 92.11                     | 91.40                     | 92.84 | 33.84        | 20.19       | 54.84 | 30.39                | 24.89        | 38.23 |
|                     | <b>2005</b>     | 98.07                     | 97.34                     | 98.80 | 31.54        | 17.39       | 53.65 | 32.90                | 26.93        | 41.24 |
|                     | <b>2006</b>     | 92.28                     | 91.59                     | 92.98 | 35.09        | 21.14       | 56.41 | 34.54                | 28.66        | 42.75 |
|                     | <b>2007</b>     | 90.61                     | 89.94                     | 91.28 | 39.56        | 24.26       | 62.37 | 26.87                | 22.23        | 33.88 |
|                     | <b>2008</b>     | 89.74                     | 89.09                     | 90.40 | 41.26        | 23.92       | 66.95 | 33.19                | 27.37        | 41.38 |
|                     | <b>2009</b>     | 84.28                     | 83.66                     | 84.91 | 19.75        | 9.36        | 38.20 | 28.22                | 23.34        | 35.49 |
|                     | <b>2010</b>     | 85.71                     | 85.09                     | 86.33 | 33.55        | 18.80       | 56.39 | 29.95                | 24.86        | 37.43 |
| <b>2011</b>         | 85.56           | 84.96                     | 86.18                     | 25.95 | 13.49        | 46.49       | 28.27 | 23.45                | 35.49        |       |
| Slope (p-value)     |                 | <b>-1.47 (p&lt;0.05)*</b> |                           |       | -0.90 (0.32) |             |       | -0.38 (0.28)         |              |       |

\*Significant trends (p<0.05) are indicated in bold
